# Supplementary material for: Mitochondrial Phosphoenolpyruvate Carboxykinase (PCK2) Maintains the Function of Bone Marrow Mesenchymal Stromal/stem Cells to Rescue Osteoporotic Phenotype Partly Through Autophagy Dependent Manner
Source: Research Square preprint supplement (doi:10.21203/rs.3.rs-115769/v1), 2020-12-01
Supplement: Supplementary file 1 [file 35a2768174a7792b59d32f6f.docx]

**Table 1** **Sequences of RNA Oligonucleotides**

| Name | Sense strand/sense primer (5’-3’) | Antisense strand/antisense primer (5’-3’) |
| --- | --- | --- |
| **Primers (human)** |  |  |
| *PCK2* | GAGTGTTTCCCTCCCCAAGG | GCGTGCCTTTGGTGATTCAG |
| *RUNX2* | CCGCCTCAGTGATTTAGGGC | GGGTCTGTAATCTGACTCTGTCC |
| *GAPDH* | GGTCACCAGGGCTGCTTTT | GGATCTCGCTCCTGGAAGATG |
| *ALP* | GACCTCCTCGGAAGACACTC | TGAAGGGCTTCTTGTCTGTG |
| *PPAR-γ* | GCTGTTATGGGTGAAACTCTG | ATAAGGTGGAGATGCAGGTTC |
| *CEBP-α* | GCAAGGCCAAGAAGTCGGTGGC | TGCCCATGGCCTTGACCAAGGG |
| **Primers (mouse)** |  |  |
| *PCK2* | CCGCATTATGTATGTGCTT | GCCACAATTCAGAGTAATA |
| *RUNX2* | CCCGTGGCCTTCAAGGTTGT | ACAGCGGAGGCATTTCGGAG |
| *GAPDH* | CCACTCTTCCACCTTCG | GTGGTCCAGGGTTTCTTAC |
| *ALP* | GGGGACATGCAGTATGAGTT | GGCCTGGTAGTTGTTGTGAG |
| *PPAR-γ* | TCTCCAGCATTTCTGCTCCACACT | AGGCTCTTCATGTGGCCTGTTGTA |
| *CEBP-α* | GGAAAGACAACGGACAAATCA | TACGGATCGAAACTGGCAA |
